# Supplementary material
Source: Springer Nature journal article supplement (https://www.springermedizin.de/resource/supplementary/13058_2012_3237_MOESM2_ESM.pdf/9703586)

Sister control

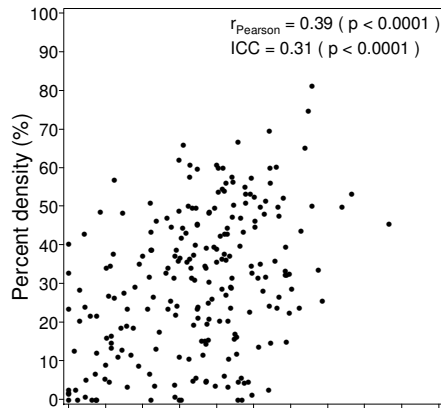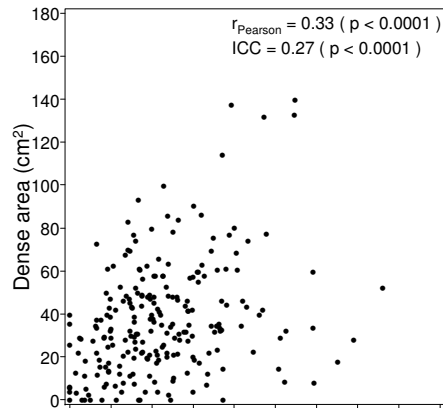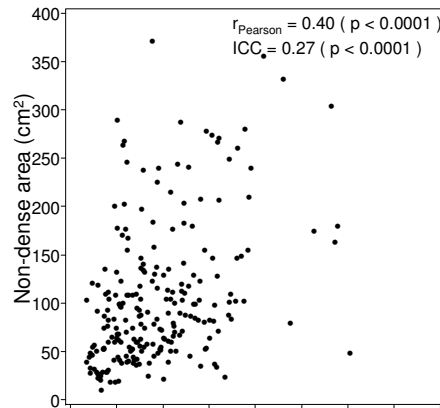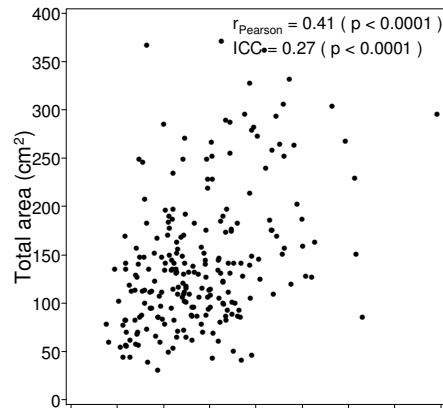

Unrelated control

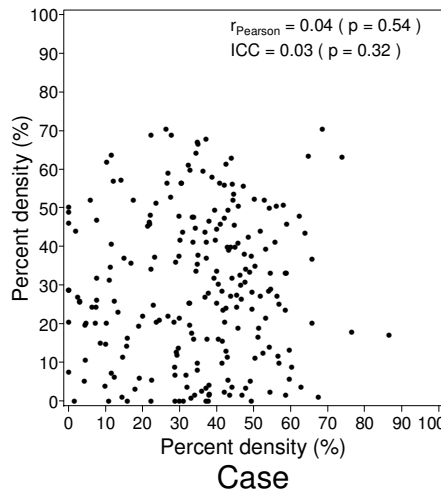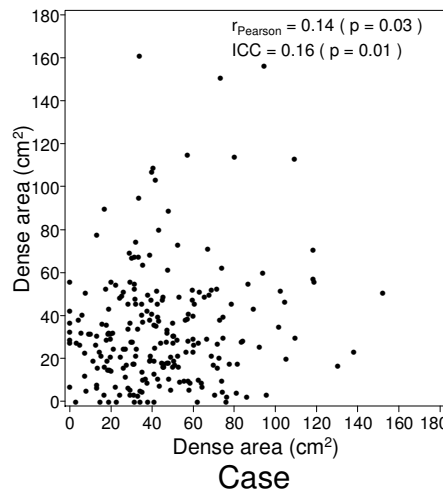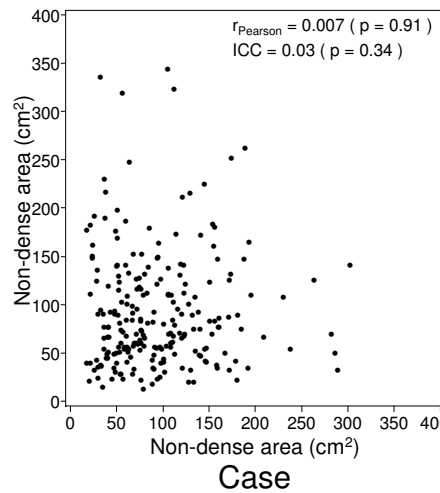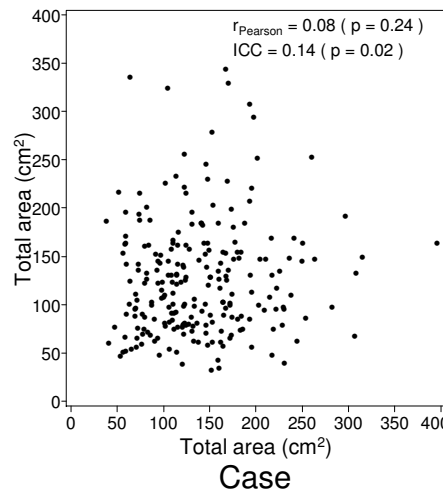

Supplement: MOESM2 [file 9703586]
